# Supplementary material
Source: HighWire-hosted journal article supplement (https://bmjopen.bmj.com/content/8/3/e018849)
Supplement: inline-supplementary-material-1 [file inline-supplementary-material-1.pdf]

## Appendix

### A.1 GEE models for OHS

Model 1: OHS = OHS.Base + Year, with identity link function and Gaussian variance to mean relation and first order autoregressive correlation structure (QIC = 53132.68).

| Model 1: Parameter estimates and naïve and robust standard errors (SE) |                 |                 |                |                  |                 |                |
|------------------------------------------------------------------------|-----------------|-----------------|----------------|------------------|-----------------|----------------|
| <i>Term</i>                                                            | <i>Estimate</i> | <i>Naive SE</i> | <i>Naive z</i> | <i>Robust SE</i> | <i>Robust z</i> | <i>p-value</i> |
| (Intercept)                                                            | 27.927          | 2.120           | 13.174         | 2.561            | 10.903          | 0.000          |
| OHS Base                                                               | 0.637           | 0.096           | 6.655          | 0.106            | 6.007           | 0.000          |
| Year                                                                   | -0.701          | 0.267           | -2.623         | 0.237            | -2.963          | 0.003          |
| Estimated Scale Parameter: 98.932; Number of Iterations: 3             |                 |                 |                |                  |                 |                |

| Model 1: Working correlation model for estimated correlation parameter 0.755 |               |               |               |               |               |  |
|------------------------------------------------------------------------------|---------------|---------------|---------------|---------------|---------------|--|
| <i>Occasion</i>                                                              | <i>Year 1</i> | <i>Year 2</i> | <i>Year 3</i> | <i>Year 4</i> | <i>Year 5</i> |  |
| <i>Year 1</i>                                                                | 1.000         | 0.755         | 0.570         | 0.430         | 0.325         |  |
| <i>Year 2</i>                                                                | 0.755         | 1.000         | 0.755         | 0.570         | 0.430         |  |
| <i>Year 3</i>                                                                | 0.570         | 0.755         | 1.000         | 0.755         | 0.570         |  |
| <i>Year 4</i>                                                                | 0.430         | 0.570         | 0.755         | 1.000         | 0.755         |  |
| <i>Year 5</i>                                                                | 0.325         | 0.430         | 0.570         | 0.755         | 1.000         |  |

Model 2: OHS = OHS.Base + Year + Year x Treat, with identity link function and Gaussian variance to mean relation and first order autoregressive correlation structure (QIC = 53170.18).

| Model 2: Parameter estimates and naïve and robust standard errors (SE) |                 |                 |                |                  |                 |                |
|------------------------------------------------------------------------|-----------------|-----------------|----------------|------------------|-----------------|----------------|
| <i>Term</i>                                                            | <i>Estimate</i> | <i>Naive SE</i> | <i>Naive z</i> | <i>Robust SE</i> | <i>Robust z</i> | <i>p-value</i> |
| (Intercept)                                                            | 28.799          | 2.383           | 12.087         | 2.608            | 11.041          | 0.000          |
| OHS.Base                                                               | 0.637           | 0.096           | 6.631          | 0.106            | 5.983           | 0.000          |
| Year                                                                   | -0.945          | 0.383           | -2.467         | 0.380            | -2.488          | 0.013          |
| THR                                                                    | -1.715          | 2.143           | -0.800         | 1.771            | -0.968          | 0.333          |
| Year x THR                                                             | 0.474           | 0.534           | 0.888          | 0.474            | 1.001           | 0.317          |
| Estimated Scale Parameter: 99.365; Number of Iterations: 3             |                 |                 |                |                  |                 |                |
| THR is effect of THR treatment relative to RSA = 0                     |                 |                 |                |                  |                 |                |

| Model 2: Working correlation model for estimated correlation parameter 0.757 |               |               |               |               |               |  |
|------------------------------------------------------------------------------|---------------|---------------|---------------|---------------|---------------|--|
| <i>Occasion</i>                                                              | <i>Year 1</i> | <i>Year 2</i> | <i>Year 3</i> | <i>Year 4</i> | <i>Year 5</i> |  |
| <i>Year 1</i>                                                                | 1.000         | 0.757         | 0.573         | 0.434         | 0.329         |  |
| <i>Year 2</i>                                                                | 0.757         | 1.000         | 0.757         | 0.573         | 0.434         |  |
| <i>Year 3</i>                                                                | 0.573         | 0.757         | 1.000         | 0.757         | 0.573         |  |
| <i>Year 4</i>                                                                | 0.434         | 0.573         | 0.757         | 1.000         | 0.757         |  |
| <i>Year 5</i>                                                                | 0.329         | 0.434         | 0.573         | 0.757         | 1.000         |  |

## A.2 GEE models for EQ-5D

Model 1: EQ5D = EQ5D.Base + Year, with identity link function and Gaussian variance to mean relation and first order autoregressive correlation structure (QIC = 54.82).

| Model 1: Parameter estimates and naïve and robust standard errors (SE) |                 |                 |                |                  |                 |                |
|------------------------------------------------------------------------|-----------------|-----------------|----------------|------------------|-----------------|----------------|
| <i>Term</i>                                                            | <i>Estimate</i> | <i>Naïve SE</i> | <i>Naïve z</i> | <i>Robust SE</i> | <i>Robust z</i> | <i>p-value</i> |
| (Intercept)                                                            | 0.629           | 0.039           | 16.003         | 0.046            | 13.554          | 0.000          |
| OHS Base                                                               | 0.436           | 0.060           | 7.324          | 0.075            | 5.820           | 0.000          |
| Year                                                                   | -0.027          | 0.010           | -2.865         | 0.009            | -3.137          | 0.002          |
| Estimated Scale Parameter: 0.092; Number of Iterations: 2              |                 |                 |                |                  |                 |                |

| Model 1: Working correlation model for estimated correlation parameter 0.567 |               |               |               |               |               |
|------------------------------------------------------------------------------|---------------|---------------|---------------|---------------|---------------|
| <i>Occasion</i>                                                              | <i>Year 1</i> | <i>Year 2</i> | <i>Year 3</i> | <i>Year 4</i> | <i>Year 5</i> |
| <i>Year 1</i>                                                                | 1.000         | 0.567         | 0.322         | 0.182         | 0.103         |
| <i>Year 2</i>                                                                | 0.567         | 1.000         | 0.567         | 0.322         | 0.182         |
| <i>Year 3</i>                                                                | 0.322         | 0.567         | 1.000         | 0.567         | 0.322         |
| <i>Year 4</i>                                                                | 0.182         | 0.322         | 0.567         | 1.000         | 0.567         |
| <i>Year 5</i>                                                                | 0.103         | 0.182         | 0.322         | 0.567         | 1.000         |

Model 2: EQ5D = EQ5D.Base + Year + Year x Treat, with identity link function and Gaussian variance to mean relation and first order autoregressive correlation structure (QIC = 57.37).

| Model 2: Parameter estimates and naïve and robust standard errors (SE) |                 |                 |                |                  |                 |                |
|------------------------------------------------------------------------|-----------------|-----------------|----------------|------------------|-----------------|----------------|
| <i>Term</i>                                                            | <i>Estimate</i> | <i>Naïve SE</i> | <i>Naïve z</i> | <i>Robust SE</i> | <i>Robust z</i> | <i>p-value</i> |
| (Intercept)                                                            | 0.647           | 0.051           | 12.648         | 0.055            | 11.682          | 0.000          |
| OHS.Base                                                               | 0.441           | 0.059           | 7.515          | 0.073            | 6.076           | 0.000          |
| Year                                                                   | -0.016          | 0.014           | -1.212         | 0.012            | -1.341          | 0.180          |
| THR                                                                    | -0.039          | 0.067           | -0.590         | 0.059            | -0.673          | 0.501          |
| Year x THR                                                             | -0.020          | 0.019           | -1.084         | 0.017            | -1.186          | 0.236          |
| Estimated Scale Parameter: 0.09; Number of Iterations: 3               |                 |                 |                |                  |                 |                |
| THR is effect of THR treatment relative to RSA = 0                     |                 |                 |                |                  |                 |                |

| Model 2: Working correlation model for estimated correlation parameter 0.565 |               |               |               |               |               |
|------------------------------------------------------------------------------|---------------|---------------|---------------|---------------|---------------|
| <i>Occasion</i>                                                              | <i>Year 1</i> | <i>Year 2</i> | <i>Year 3</i> | <i>Year 4</i> | <i>Year 5</i> |
| <i>Year 1</i>                                                                | 1.000         | 0.565         | 0.319         | 0.180         | 0.102         |
| <i>Year 2</i>                                                                | 0.565         | 1.000         | 0.565         | 0.319         | 0.180         |
| <i>Year 3</i>                                                                | 0.319         | 0.565         | 1.000         | 0.565         | 0.319         |
| <i>Year 4</i>                                                                | 0.180         | 0.319         | 0.565         | 1.000         | 0.565         |
| <i>Year 5</i>                                                                | 0.102         | 0.180         | 0.319         | 0.565         | 1.000         |
